1

2 **Potential Application of Bacteriophages in Enrichment Culture for Improved Prenatal**

3 ***Streptococcus agalactiae* Screening**

4

5 Jumpei Uchiyama<sup>a#</sup>, Hidehito Matsui<sup>b</sup>, Hironobu Murakami<sup>a</sup>, Shini-chiro Kato<sup>c</sup>, Naoki

6 Watanabe<sup>a</sup>, Tadahiro Nasukawa<sup>a</sup>, Keiji Mizukami<sup>a</sup>, Masaya Ogata<sup>a</sup>, Masahiro Sakaguchi<sup>a</sup>,

7 Shigenobu Matsuzaki<sup>d</sup>, Hideaki Hanaki<sup>b</sup>

8

9 <sup>a</sup> School of Veterinary Medicine, Azabu University, Kanagawa, Japan

10 <sup>b</sup> Kitasato Institute for Life Sciences, Kitasato University, Tokyo, Japan

11 <sup>c</sup> Research Institute of Molecular Genetics, Kochi University, Kochi, Japan

12 <sup>d</sup> Kochi Medical School, Kochi University, Kochi, Japan

13

14 Running title: Bacteriophages for *Streptococcus agalactiae* Screening

15

16 #Address correspondence to Jumpei Uchiyama, [uchiyama@azabu-u.ac.jp](mailto:uchiyama@azabu-u.ac.jp).

17

18 **ABSTRACT**

19 Vertical transmission of *Streptococcus agalactiae* can cause neonatal infections. A culture  
20 test in the late stage of pregnancy is used to screen for the presence of maternal *S.*  
21 *agalactiae* for intrapartum antibiotic prophylaxis. For the test, vaginal-rectal swab sampling  
22 is immediately followed by enrichment culture and bacterial identification. In some cases,  
23 *Enterococcus faecalis* competes with and overgrows *S. agalactiae* in the enrichment  
24 culture. Consequently, the identification test occasionally yields false-negative results.  
25 Bacterial viruses, bacteriophages (phages), infect and kill specific host bacteria. In the  
26 current study, we explored the feasibility of using phages to minimize the undesirable *E.*  
27 *faecalis* outgrowth and facilitate *S. agalactiae* detection in an experimental setting. Phage  
28 mixture was prepared using three phages that specifically infect *E. faecalis*: phiEF24C,  
29 phiEF17H, and phiM1EF22. The mixture inhibited the growth of 86.7% (26/30) of *E.*  
30 *faecalis* strains tested in the enrichment broth. When single strains of *E. faecalis* and *S.*  
31 *agalactiae* were inoculated in the enrichment broth containing the phage mixture, bacterial  
32 growth was inhibited or facilitated, respectively. Further, several sets of *S. agalactiae* and *E.*  
33 *faecalis* strains were co-cultured, and bacteria were detected on chromogenic agar after the  
34 enrichment culture. *S. agalactiae* was dominant after plating a phage mixture-treated

35 co-culture, while it was barely detected after plating the untreated co-culture. Considering  
36 these observations, the phage mixture can be employed in the *S. agalactiae* culture test to  
37 increase test accuracy.

38

39 Keywords: phage, *Enterococcus faecalis*, *Streptococcus agalactiae*, culture enrichment

40

## 41 INTRODUCTION

42 *Streptococcus agalactiae* (also called group B streptococcus) is vertically transmitted to the  
43 newborn during delivery, and can cause neonatal infections (1, 2). Common early-onset  
44 diseases caused by this organism in infants include sepsis and pneumonia, and (rarely)  
45 meningitis (1, 2). To prevent such infections, prenatal *S. agalactiae* culture test is  
46 recommended in the late stage of pregnancy (1, 2). In the case of a positive test result, the  
47 pregnant carrier is prophylactically treated with antibiotics to prevent vertical transmission  
48 of *S. agalactiae* during the intrapartum period (1, 2).

49 For the *S. agalactiae* culture test, the Center of Disease Control and Prevention  
50 highly recommends an enrichment culture, followed by conventional *S. agalactiae*  
51 identification (3, 4). In the culture test, a swab is taken from the vaginal and anorectal areas,  
52 and the samples are inoculated and cultured in an enrichment culture broth selective for *S.*  
53 *agalactiae*. After the enrichment culture, bacterial identification is performed, e.g., by using  
54 the Christie-Atkins-Munch-Petersen test, serologic identification, growth on chromogenic  
55 agar, and nucleic acid amplification (4). However, although a selective culture broth is used  
56 for the enrichment culture, *S. agalactiae* is poorly recovered along with overgrowth of  
57 *Enterococcus faecalis* (5-8). This may lead to false-negative results in the subsequent

58 identification tests (5-8). To address the problem of false-negative results, selective  
59 antimicrobial agents to be included in the enrichment broth should be re-evaluated.

60 Bacteriophages (phages), i.e., bacterial viruses, infect specific bacteria. Some  
61 phages infect and lyse bacteria at the specificity level of species and strains. These phage  
62 characteristics have been used to eliminate most cells in a bacterial population and facilitate  
63 the isolation of less prevalent environmental bacteria that produce novel bioactive  
64 compounds (9). Phage applicability for the isolation of food-poisoning microbes in the food  
65 microbiology field has also been examined (10). Hence, potentially, phage application  
66 might also be used to reduce the unwanted growth of *E. faecalis* and facilitate *S. agalactiae*  
67 growth in an *S. agalactiae* enrichment culture in clinical microbiology. Indeed, phages that  
68 specifically infect *E. faecalis* have been isolated from environmental samples, such as  
69 sewage and canal water (11-13). In the current study, we examined the applicability of *E.*  
70 *faecalis*-specific phages to suppress *E. faecalis* growth in *S. agalactiae* enrichment culture.

71

## 72 MATERIALS AND METHODS

73 **Bacteria, phages, and culture media.** Strains of *E. faecalis* ( $n = 30$ ), *S.*  
74 *agalactiae* ( $n = 7$ ), *Enterococcus avium* ( $n = 5$ ), and *Enterococcus faecium* ( $n = 5$ ) were

75 isolated from vaginal swabs using the Chrom-ID Strepto B test (bioMérieux,  
76 Marcy-l'Étoile, France). The swabs were obtained after random sampling at local hospitals  
77 in eastern Japan (Table S1). Bacteria were cultured at 37°C under aerobic or microaerobic  
78 (i.e., 5% CO<sub>2</sub>) condition, as appropriate, based on their specific growth requirements (Table  
79 S1).

80 Phage phiEF24C has been isolated and characterized, as described elsewhere (12,  
81 14, 15). Phage phiEF17H was newly isolated from canal water in Kochi (Japan). Phage  
82 phiM1EF22 was newly isolated from sewage water in Tokyo (Japan) (Table S2). The  
83 isolation procedures are described elsewhere (12). *E. faecalis* strains KUEF01, KUEF25,  
84 and KUEF27, described in Table S1, were used as host bacteria for phages phiEF24C,  
85 phiEF17H, and phiM1EF22, respectively, for phage amplification and plaque assay.  
86 Bacterial-phage suspensions were cultured aerobically at 37°C.

87 *Enterococcus* spp. and phages were cultured in tryptic soy broth or agar (TSA),  
88 and *S. agalactiae* was cultured in Todd-Hewitt broth (THB), unless stated otherwise.  
89 Granada-type broth with slight modification [GBwSM; 25.0 g/l proteose peptone no. 3,  
90 14.0 g/l soluble starch, 2.5 g/l glucose, 1.0 g/l pyruvic acid sodium salt, 0.1 g/l cysteine  
91 hydrochloride, 0.3 g/l magnesium sulfate, 11.0 g/l 3-(*N*-morpholino)propane sulfonic acid,

92 10.7 g/l disodium hydrogen phosphate, 0.5 mg/l crystal violet, 10 mg/l colistin sulfate, 10  
93 mg/l metronidazole, and 15 mg/l nalidixic acid, pH 7.4] was originally prepared as the *S.*  
94 *agalactiae* enrichment broth (16, 17). Alternatively, the pigmented enrichment Lim broth  
95 (modified Lim broth; Kyokuto Pharmaceutical Industrial, Tokyo, Japan) was used as an *S.*  
96 *agalactiae* enrichment broth. Unless stated otherwise, all culture media were purchased  
97 from Becton, Dickinson, and Co. (Franklin Lakes, NJ). All chemicals and reagents were  
98 purchased from Nacalai Tesque (Kyoto, Japan) and FUJIFILM Wako Pure Chemical  
99 (Osaka, Japan).

100 **Phage genome sequencing.** After phage amplification, phage particles were  
101 purified from 500 ml of phage lysate by CsCl density-gradient centrifugation, as described  
102 elsewhere (18). Phage genomic DNA was then prepared by phenol-chloroform extraction of  
103 the collected purified phage band, as described (18). Shotgun library was prepared for each  
104 phage DNA using the GS FLX Titanium rapid library preparation kit (Roche Diagnostics,  
105 Indianapolis, IN), according to the manufacturer's instruction. The libraries were analyzed  
106 using a GS Junior 454 sequencer (Roche Diagnostics). The sequence reads were assembled  
107 using the 454 Newbler software (version 3.0; 454 Life Sciences, Branford, CT). The  
108 genome sequences were analyzed by using BLASTn at the National Center for

109 Biotechnology Information (NCBI;  
110 [https://blast.ncbi.nlm.nih.gov/Blast.cgi?PROGRAM=blastn&PAGE\\_TYPE=BlastSearch&](https://blast.ncbi.nlm.nih.gov/Blast.cgi?PROGRAM=blastn&PAGE_TYPE=BlastSearch&LINK_LOC=blasthome)  
111 [LINK\\_LOC=blasthome](https://blast.ncbi.nlm.nih.gov/Blast.cgi?PROGRAM=blastn&PAGE_TYPE=BlastSearch&LINK_LOC=blasthome); last accessed: 5 May, 2018). The genomes were annotated using a  
112 prokaryotic genome annotation pipeline, DFAST (<https://dfast.nig.ac.jp/>) (19, 20).

113 **Multi-locus sequence typing (MLST) of *E. faecalis* strains.** *E. faecalis* strains  
114 were cultured overnight, bacterial DNA was extracted, and MLST analysis was performed,  
115 according to the procedures described elsewhere (21). The sequence alleles were analyzed  
116 using the *E. faecalis* MLST database (<https://pubmlst.org/efaecalis/>; last accessed: 5  
117 January, 2018) to designate sequence types (STs) (22). The concatenating allele sequences  
118 were analyzed using MEGA 7.0.18, and sequence alignment implemented in ClustalW was  
119 followed by phylogenetic tree construction by the UPGMA method (23).

120 **Examination of antibacterial activity of *E. faecalis* to *S. agalactiae*.** The anti-*S.*  
121 *agalactiae* activity of *E. faecalis* was examined by spot-on-lawn assay, as described  
122 elsewhere (24). Briefly, 200 µl of overnight bacterial culture of a single *S. agalactiae* strain  
123 were mixed with a melted 0.5% (w/v) soft agar and plated onto 1.5% (w/v) agar. One  
124 microliter of *E. faecalis* overnight culture was spotted on the solidified top agar. After  
125 incubation overnight at 37°C in a microaerophilic condition, *S. agalactiae* growth around



126 the spotted *E. faecalis* was examined.

127           **Analysis of phage lytic activity.** The phage host range was determined by a streak  
128 test, as described elsewhere (12, 15). Briefly, 200  $\mu$ l of overnight bacterial culture of a  
129 single bacterial strain were mixed with a melted 0.5% (w/v) soft agar and plated onto 1.5%  
130 (w/v) agar. Phage suspension (ca.  $1.0 \times 10^{8-9}$  PFU/ml) was streaked onto the solidified top  
131 agar. After incubation overnight at 37°C, bacterial lysis, with or without plaque formation,  
132 was examined.

133           **Analysis of bacterial growth inhibition by the phage mixture in *S. agalactiae***  
134 **enrichment broths.** Bacteria were cultured until optical density of 0.4–0.6 at 600 nm. After  
135 washing and diluting with GBwSM,  $3.0\text{--}5.0 \times 10^8$  CFU/ml bacterial suspension was  
136 prepared in GBwSM. Each phage suspension was diluted in THB to ca.  $3.0 \times 10^8$  PFU/ml,  
137  $3.0 \times 10^6$  PFU/ml, and  $3.0 \times 10^4$  PFU/ml. Phage mixtures were prepared by mixing equal  
138 volumes of phage suspensions at the same dilution. Then, 5  $\mu$ l of bacterial suspension and 5  
139  $\mu$ l of phage mixture were added to 140  $\mu$ l of GBwSM in a well of a flat-bottomed  
140 polystyrene 96-well plate (AS ONE Co., Osaka, Japan). In the experiments, 5  $\mu$ l of THB  
141 was used instead of the bacterial suspension and/or phage mixture as a control. The 96-well  
142 plate was incubated at 37°C and sample turbidity was measured over time at 595 nm, using

143 a Multiskan JX spectrophotometer (Thermo Labsystems, Stockholm, Sweden). The  
144 experiments were conducted in triplicate, and the growth curves were then plotted using  
145 averaged values with standard deviations.

146 **Analysis of bacterial densities in *S. agalactiae* and *E. faecalis* co-culture with**  
147 **phage mixtures.** Rifampicin-resistant mutant clone of *S. agalactiae* was isolated by  
148 aerobically culturing *S. agalactiae* strain KUGBS2 on TSA containing 20 µg/ml rifampicin  
149 at 37°C for 2 d. The putative mutant clones were re-purified at least three times; each  
150 re-purification round was repeated for 1 d under the same incubation conditions. One  
151 resultant rifampicin-resistant mutant clone of strain KUGBS2 was obtained and was  
152 tentatively designated as strain KUGBS2rif. *S. agalactiae* strain KUGBS2rif and *E.*  
153 *faecalis* strain KUEF08 were cultured individually until optical density of 0.4–0.6 at 600  
154 nm. After diluting with the enrichment broth, suspensions of  $3.0 \times 10^4$  CFU/ml *S.*  
155 *agalactiae* strain KUGBS2rif and  $3.0 \times 10^7$  CFU/ml *E. faecalis* strain KUEF08 were  
156 prepared. Each phage suspension was diluted with THB to ca.  $3.0 \times 10^6$  PFU/ml or  $3.0 \times$   
157  $10^4$  PFU/ml. By mixing equal volumes of phage suspensions at the same dilution, mixtures  
158 of two different dilutions of phages were prepared.

159 For the experiment, 100 µl each of *S. agalactiae* strain KUGBS2rif and *E. faecalis*

160 strain KUEF08, and 300 µl of phage mixture were added to 10 ml of the *S. agalactiae*  
161 enrichment broth. As negative controls, the same volume of THB was added instead of  
162 bacterial suspensions and/or phage suspensions. The mixtures were microaerobically  
163 incubated at 37°C for 24 h. Total bacterial density, and *S. agalactiae* strain KUGBS2rif and  
164 *E. faecalis* strain KUEF08 densities were determined. Total bacterial densities were  
165 determined on TSA. TSA supplemented with 20 µg/ml rifampicin and  
166 *Enterococcus*-selective agar (EF agar base “Nissui”; Nissui Pharmaceutical Co., Tokyo,  
167 Japan) were used to determine the densities of *S. agalactiae* strain KUGBS2rif and *E.*  
168 *faecalis* strain KUEF08, respectively. *S. agalactiae* strain KUGBS2rif did not grow on the  
169 *Enterococcus*-selective agar; conversely, *E. faecalis* strain KUEF08 did not grow on TSA  
170 containing 20 µg/ml rifampicin.

171 **Detection of bacteria on chromogenic selective agar after *S. agalactiae* and *E.***  
172 ***faecalis* co-culture with phage mixtures.** *S. agalactiae* and *E. faecalis* were cultured  
173 individually until optical density of 0.4–0.6 at 600 nm. *S. agalactiae* and *E. faecalis*  
174 cultures were diluted with THB to ca.  $3.0\text{--}5.0 \times 10^4$  CFU/ml and ca.  $3.0 \times 10^7$  CFU/ml,  
175 respectively. After dilution of individual phage suspensions in THB to ca.  $1.0 \times 10^7$  PFU/ml,  
176 phage mixture was prepared by mixing equal volumes of the diluted phage suspensions.

177 For the experiment, 30  $\mu$ l each of bacterial suspensions of *S. agalactiae* and *E.*  
178 *faecalis*, and 30  $\mu$ l of phage mixture were added to 3 ml of the enrichment broth. As a  
179 negative control, the same volume of THB was added instead of the phage mixture. After  
180 24-h incubation at 37°C, a loop-full of the suspension was inoculated on the Chrom-ID  
181 Strepto B agar (bioMérieux). After 24-h incubation at 37°C in darkness, colony color and  
182 appearance on agar plates were examined. All incubations were made under  
183 microaerophilic conditions.

184 **Accession numbers.** The phiEF17H and phiM1EF22 genome sequences were  
185 deposited in the GenBank under the accession numbers AP018714 and AP018715,  
186 respectively.

187 **Statistical analysis.** The data were statistically analyzed using EZR (Saitama  
188 Medical Center, Jichi Medical University, Saitama, Japan), which is a graphical user  
189 interface for R (The R Foundation for Statistical Computing, Vienna, Austria) (25).  
190 Student's *t*-tests were used to analyze differences between bacterial densities in different  
191 treatments. The value of  $P < 0.01$  was considered to indicate statistically significant  
192 difference.

193 **Data availability.** By publishing in the journal, the authors agree that, subject to

194 requirements or limitations imposed by local and/or U.S. Government laws and regulations,  
195 any materials and data that are reasonably requested by others are available from a publicly  
196 accessible collection or will be made available in a timely fashion, at reasonable cost, and  
197 in limited quantities to members of the scientific community for noncommercial purposes.  
198 The authors guarantee that they have the authority to comply with this policy either directly  
199 or by means of material transfer agreements through the owner.

200

## 201 **RESULTS AND DISCUSSION**

202 **Phage characteristics.** Phages phiEF24C, phiEF17H, and phiM1EF22 were used  
203 in the current study. Phage phiEF24C, one of the well-studied *Enterococcus* phages, is  
204 classified into the family *Myoviridae* subfamily *Spounavirinae* (26). Based on the  
205 whole-genome sequence similarities to the phage phiEF24C genome, phages phiEF17H  
206 and phiM1EF22 share viral taxonomy with that phage (Table S3). Phages sharing this  
207 particular viral taxonomy are highly virulent toward host bacteria (27).

208 MLST analysis of the *E. faecalis* vaginal swab isolates (Fig. 1) revealed that  
209 43.3% (13/30) of *E. faecalis* strains were phylogenetically closely related, representing  
210 either ST16 or ST179. The remaining strains [56.7% (17/30)] were genetically diverse.

211 Moreover, *E. faecalis* strains, which interfere *S. agalactiae* culture tests, do not seem to  
212 show antibacterial activity (e.g., bacteriocin production) to the *S. agalactiae*, while some of  
213 them are able to show anti-bacterial activity to a variety of bacteria (5, 28). Testing the  
214 antibacterial activity to *S. agalactiae* strains by the spot-on-lawn assay, no anti-*S.*  
215 *agalactiae* activity was observed among these *E. faecalis* strains.

216 Phage lytic activity was examined by a streak test using these *E. faecalis* strains  
217 (Fig. 1). Phages phiEF24C, phiEF17H, and phiM1EF22 showed lytic activity toward  
218 63.3% (19/30), 76.7% (23/30), and 66.7% (20/30), respectively, of the tested *E. faecalis*  
219 strains. Lytic activities of the three phages with other bacterial vaginal swab isolates (*E.*  
220 *avium*, *E. faecium*, and *S. agalactiae* strains) were also examined, but no lytic activity was  
221 observed.

222 **Lytic activity of the phage mixture as an *E. faecalis*-selective antimicrobial**  
223 **agent.** Phages phiEF24C, phiEF17H, and phiM1EF22 lysed different *E. faecalis* strains and  
224 also some common strains. Theoretically, a combination of these three phages lysed a  
225 broader range of *E. faecalis* strains than any single phage tested. Phage mixture containing  
226 the three phages was prepared by mixing phage particles in 1:1:1 ratio. The lytic spectrum  
227 of the phage mixture was then examined by using a streak test. The phage mixture showed

228 lytic activity toward 86.7% (26/30) of *E. faecalis* strains tested (Fig. 1). Four *E. faecalis*  
229 strains were not lysed by the phages, namely, KUEF02 (MLST ST47), KUEF18 (ST64),  
230 KUEF15 (ST30), and KUEF28 (ST179). The phage mixture did not show any lytic activity  
231 with the other tested bacteria, i.e., *E. avium*, *E. faecium*, and *S. agalactiae*.

232 To evaluate the effect of the phage mixture on the growth of *E. faecalis* in the  
233 enrichment broth, *E. faecalis* growth was monitored in the presence of three dilutions of the  
234 phage mixture in GBwSM. The medium lacked the customary pigment enhancer  
235 methotrexate to improve data reliability (16, 17). After bacterial inoculation, phage mixture  
236 was added to the multiplicity of infection (MOI) of each phage of 1,  $10^{-2}$ , or  $10^{-4}$ . For the *S.*  
237 *agalactiae* enrichment culture, 18–24-h incubation is recommended (3, 4). Consequently,  
238 the turbidity of cultures of 30 *E. faecalis* strains described in Fig. 1 was recorded in the  
239 presence or absence of the phage mixture over 24 h.

240 To simplify data interpretation, *E. faecalis* growth curves were tentatively  
241 categorized into four patterns (A–D), after comparing with the growth curve of untreated *E.*  
242 *faecalis* (Fig. 2A). For strains representing pattern A growth curve, *E. faecalis* growth was  
243 inhibited throughout the experiment. For strains representing pattern B growth curve, *E.*  
244 *faecalis* growth was initially inhibited (8 h post inoculation) and then gradually recovered.

245 For strains representing pattern C growth curve, bacteria showed an initial growth but were  
246 then lysed. Pattern C was a typical phage lysis pattern at the lower MOI tested. *E. faecalis*  
247 strains that exhibited growth patterns A–C were inhibited by the phage treatment. The  
248 tested *E. faecalis* strains treated with higher concentrations of phage mixtures and ones that  
249 were most sensitive to phage mixture treatments tended to exhibit growth patterns A, B,  
250 and C, in the order of strongest to weakest inhibition. On the other hand, phage treatment  
251 did not inhibit *E. faecalis* strains exhibiting growth pattern D. The four phage-insensitive *E.*  
252 *faecalis* strains (KUEF02, KUEF18, KUEF15, and KUEF28), and *E. avium*, *E. faecium*,  
253 and *S. agalactiae* strains exhibited growth pattern D. The reasons for such tentative growth  
254 pattern categorization (i.e., growth patterns A–D) were probably due to (1) different  
255 sensitivity of *E. faecalis* strains to phages, and (2) the use of three dilutions of the phage  
256 mixture in experiments.

257 The tentative grouping of growth patterns of the 30 tested *E. faecalis* is  
258 summarized in Fig. 2B. Phage mixture treatments at the highest and the second highest  
259 phage density (i.e., MOI 1 and  $10^{-2}$ , respectively) inhibited the growth of 86.7% (26/30) of  
260 *E. faecalis* strains, which was in agreement with the results of the streak test (Fig. 1). On  
261 the other hand, when the phage density was reduced (i.e., MOI  $10^{-4}$ ), the number of *E.*



262 *faecalis* strains whose growth was inhibited was reduced (76.7%, 23/30 strains). The latter  
263 23 strains largely represented growth pattern C, probably because the input phage titer was  
264 much lower than that in the other phage mixture treatments. The seven remaining *E.*  
265 *faecalis* strains that exhibited growth pattern D included the four phage mixture-insensitive  
266 strains mentioned above and strains KUEF03 (ST3), KUEF19 (ST16), and KUEF30 (ST16).  
267 In the current study, a correlation between growth patterns and STs was not observed  
268 among the *E. faecalis* strains tested.

269         Based on these observations, we concluded that the phage mixture inhibited the  
270 growth of 86.7% (26/30) of *E. faecalis* strains tested, when used at sufficiently high density  
271 (i.e., MOI of at least  $10^{-2}$ ).

272         **The effect of phage mixture on *S. agalactiae* and *E. faecalis* cell densities in**  
273 **experimental enrichment cultures.** Phage mixture may have been contaminated with this  
274 anti-*S. agalactiae* agents during phage mixture preparation (i.e., during phage propagation  
275 on the *E. faecalis* host). However, incubation of phage mixture with *S. agalactiae* did not  
276 significantly affect bacterial viability, compared with a THB-treated negative control (Fig.  
277 S1), excluding the possibility of phage mixture contamination with anti-*S. agalactiae*  
278 substances.

279           The effects of phage mixture were then examined in co-cultures of *E. faecalis* and  
280 *S. agalactiae* in the Granada-type enrichment broth. The rifampicin-resistant mutant clone  
281 of strain KUGBS2, KUGBS2rif, was isolated. *S. agalactiae* strain KUGBS2rif and *E.*  
282 *faecalis* strain KUEF08 were used to quantify viable bacterial individually. To mimic the  
283 situation that *S. agalactiae* was poorly recovered, *S. agalactiae* strain KUGBS2rif and *E.*  
284 *faecalis* strain KUEF08 were inoculated into GBwSM at  $3.0 \times 10^2$  CFU/ml and  $3.0 \times 10^5$   
285 CFU/ml, respectively. Either of the two dilutions of phage mixture (at MOI of each phage  
286 of  $10^{-1}$  and  $10^{-3}$  to *E. faecalis*) were added. As a negative control, THB was used instead of  
287 the phage mixture.

288           Changes in bacterial cell density (total bacteria, *S. agalactiae*, and *E. faecalis*)  
289 were then monitored over time (Fig. 3). Based on the determined total bacteria numbers,  
290 bacteria grew exponentially for up to 12 h, following which the cultures entered the  
291 stationary phase of growth. Hence, 12–24-h incubation was sufficient to achieve bacterial  
292 enrichment in that particular experimental setting. Moreover, changes in *E. faecalis* and *S.*  
293 *agalactiae* cell densities were then evaluated. In the negative control group (i.e., no phage  
294 treatment), *E. faecalis* grew much better than *S. agalactiae*. In the phage treatment groups,  
295 the opposite was observed. After 12 and 24 h, in the phage treatment groups, cell density of

296 *E. faecalis* was significantly lower than that of *S. agalactiae* ( $P < 0.01$ ).

297           Several types of enrichment broths are commercially available for *S. agalactiae*  
298 culture test. In addition to the GBwSM medium, we also evaluated the effectiveness of  
299 phage treatment of an *E. faecalis* and *S. agalactiae* co-culture in the commercially available  
300 pigmented enrichment Lim broth (Fig. S2). The experiments were performed as described  
301 above. Inhibition of *E. faecalis* growth, compared with the untreated group, was observed  
302 in phage treatment groups at both MOIs of each phage tested (i.e., 1 and  $10^{-2}$ ) (Fig. S3).  
303 This indicated that phage mixture inhibited *E. faecalis* growth and facilitated *S. agalactiae*  
304 growth in both *S. agalactiae* enrichment broths.

305           **Efficient detection of *S. agalactiae* after enrichment culturing in the presence**  
306 **of phage mixture.** In the *S. agalactiae* culture test, bacteria are generally identified in a  
307 culture aliquot after enrichment culture. Consequently, we then evaluated the efficiency of  
308 *S. agalactiae* identification after the experimental enrichment culture. As the identification  
309 assay, we used growth on the *S. agalactiae* chromogenic agar, in which *S. agalactiae*  
310 colonies are distinguished from *E. faecalis* colonies based on color. We tested several *S.*  
311 *agalactiae*–*E. faecalis* combinations. *E. faecalis* and *S. agalactiae* strains were first  
312 inoculated at 100:1 ratio in the Granada-type enrichment broth, the phage mixture was

313 added (at an MOI of each phage at  $10^{-1}$  to *E. faecalis*), and the cultures incubated.  
314 Enrichment culture aliquots were plated on chromogenic agar, and the resultant colony  
315 appearance evaluated (Fig. 4). After enrichment of all phage-treated *S. agalactiae*–*E.*  
316 *faecalis* sets, *S. agalactiae* colonies were dominant on the agar plates. By contrast, in  
317 enrichment cultures without phage treatment, only few *S. agalactiae* colonies were  
318 observed on the chromogenic agar, while *E. faecalis* colonies were dominant. The same  
319 experiment was performed using the modified Lim broth and several *S. agalactiae*–*E.*  
320 *faecalis* combinations (Fig. S4). The data were in agreement with observations made using  
321 the GBwSM medium. Thus, the phage mixture treatment improved the *S. agalactiae*  
322 culture test by inhibiting the undesirable growth of *E. faecalis*, even when the initial *E.*  
323 *faecalis* cell density was as high  $10^5$  CFU/ml.

324 **Phage application potential in the clinical setting.** In the current study, we  
325 showed that a specific phage mixture effectively inhibited the growth of *E. faecalis* in an *S.*  
326 *agalactiae* culture test in the experimental setting. Before reagent manufacture and clinical  
327 application, phage composition in the phage mixture, the usage per assay (i.e., volume and  
328 phage density), storage of the phage mixture, and production cost should be optimized.

329 As a first consideration, strains insensitive to the phage mixture may occur at a

330 higher than expected rate in the clinical setting. To address this issue, phage sensitivity of *E.*  
331 *faecalis* strain should be constantly examined. The effective spectrum of phages in a  
332 mixture can be modified by replacing and/or adding other phages, including newly-isolated  
333 phages, naturally-evolved phages, and/or genetically-modified phages (29, 30). E.g., by  
334 adding six newly isolated phages to the phage mixture developed in the current study, we  
335 increased the inhibition efficiency among the tested *E. faecalis* strains to 96.7% (29/30)  
336 (data not shown). Hence, updating the composition of the phage mixture will help to  
337 address the problem associated with the phage-insensitive strains.

338         Next, we considered the usage per assay. Assuming that the volume of the  
339 enrichment broth is ca. 3–4 ml, a drop of phage mixture suspension (i.e., 30–50  $\mu$ l of a  
340 solution of ca.  $1.0 \times 10^7$  PFU/ml of each phage) would suffice for an assay. Such usage per  
341 assay is in line with the usage of phage mixture in experiments performed in the current  
342 study (Fig. 4). Thus, phage mixture complies with the usage expected in a clinical setting.

343         Moreover, the quality of the phage mixture should be guaranteed to allow its  
344 commercialization. Phages are generally stable at 4°C in culture media for a certain period  
345 of time (31, 32), which suggests that phage products can be distributed on a market-scale  
346 using the cold chain. Accordingly, we examined the infectious density of each phage

347 solution during storage at 4°C for 270 d, and we did not observe any substantial reduction  
348 in phage particle density during this time period (Fig. S5). Shelf life of culture medium is  
349 generally up to 6 months (33), and no loss in sensitivity in *S. agalactiae* enrichment broths  
350 were observed after at least 4 months (34). Thus, the stability of the phage mixture  
351 appeared to be in line with the storage of the enrichment broths.

352 Finally, the use of phage mixture should be cost-effective. Phage production on a  
353 bioreactor-scale has been recently investigated because of increased interest in phage  
354 therapy. Consequently, the cost of phage production is estimated to be  $\$4.4 \times 10^{-13}$ /phage  
355 particle (35-37). Hence, the calculated cost of phage mixture per assay in the current study  
356 is only  $\$2.2 \times 10^{-7}$  ( $\$4.4 \times 10^{-13}$ /phage particle multiplied by the number of phage particles  
357 in the mixture, i.e.,  $1.0 \times 10^7$  PFU/ml  $\times$  50  $\mu$ l). Several commercial phage companies have  
358 been founded worldwide (38). Thus, phage mixture may, in theory, be produced for the *S.*  
359 *agalactiae* culture test in a cost-effective manner.

360 After commercialization of the phage mixture, special attention should be devoted  
361 to the biological characteristics of phages to avoid laboratory accidents, since phage  
362 products are not commonly used in the clinical microbiology. Phages multiply  
363 exponentially and exceed bacterial growth, which might lead to phage contamination and

364 interference with *E. faecalis* culture tests in a clinical laboratory. To avoid such accidents,  
365 appropriate safety precautions should be instated when preparing to use phage products.  
366 These can include change of gloves after usage, aseptic handling at a specified bench, and  
367 storage in a specific cabinet (39). We believe that that the phage mixture satisfies the usage  
368 in terms of application volume and density, as long as the knowledge and safety precautions  
369 for phage products are disseminated and implemented.

370           Considering the above, we anticipate that the phage mixture will become  
371 commercially available for *S. agalactiae* enrichment broths in the future and will be used in  
372 the clinical setting.

373

#### 374 **ACKNOWLEDGMENTS**

375           We thank Mr. Takuya Nakajima and Ms. Mio Sasaki (School of Veterinary  
376 Medicine, Azabu University, Kanagawa, Japan) for support in performing the experiments.

377 This research was partially supported by research project grants awarded by the Azabu  
378 University Research Services Division. All the authors significantly contributed to the work.

379 There are no conflicts of interest to declare.

380

381    **REFERENCES**

- 382    1.     Morgan JA, Cooper DB. 2018. Pregnancy, Group B *Streptococcus*. StatPearls  
383            Publishing, Treasure Island, FL [updated 11 February, 2018].
- 384    2.     Edmond KM, Kortsalioudaki C, Scott S, Schrag SJ, Zaidi AK, Cousens S, Heath PT.  
385            2012. Group B streptococcal disease in infants aged younger than 3 months:  
386            systematic review and meta-analysis. *Lancet* 379:547–556.
- 387    3.     Cagno CK, Pettit JM, Weiss BD. 2012. Prevention of perinatal group B  
388            streptococcal disease: updated CDC guideline. *Am Fam Physician* 86:59–65.
- 389    4.     Rosa-Fraile M, Spellerberg B. 2017. Reliable detection of group B *Streptococcus* in  
390            the clinical laboratory. *J Clin Microbiol* 55:2590–2598.
- 391    5.     Dunne WM, Jr., Holland-Staley CA. 1998. Comparison of NNA agar culture and  
392            selective broth culture for detection of group B streptococcal colonization in women.  
393            *J Clin Microbiol* 36:2298–2300.
- 394    6.     Park CJ, Vandell NM, Ruprai DK, Martin EA, Gates KM, Coker D. 2001. Detection  
395            of group B streptococcal colonization in pregnant women using direct latex  
396            agglutination testing of selective broth. *J Clin Microbiol* 39:408–409.
- 397    7.     Binghuai L, Yanli S, Shuchen Z, Fengxia Z, Dong L, Yanchao C. 2014. Use of



- 398 MALDI-TOF mass spectrometry for rapid identification of group B *Streptococcus*  
399 on chromID Strepto B agar. *Int J Infect Dis* 27:44–48.
- 400 8. Baden M, Higashiyama T, Ikemoto T, Okada Y. 2016. Evaluation of direct latex  
401 agglutination of selective broth for detection of group B streptococcal carriage in  
402 pregnant women. *J Japn Soc Clin Microbiol* 26:7–13.
- 403 9. Kurtböke D. 2005. Actinophages as indicators of actinomycete taxa in marine  
404 environments. *Antonie Van Leeuwenhoek* 87:19–28.
- 405 10. Muldoon MT, Teaney G, Li J, Onisk DV, Stave JW. 2007. Bacteriophage-based  
406 enrichment coupled to immunochromatographic strip-based detection for the  
407 determination of *Salmonella* in meat and poultry. *J Food Prot* 70:2235–2242.
- 408 11. Khalifa L, Copenhagen-Glazer S, Shlezinger M, Kott-Gutkowski M, Adini O,  
409 Beyth N, Hazan R. 2015. Complete genome sequence of *Enterococcus*  
410 bacteriophage EFLK1. *Genome Announc* 3:pil:e01308-15.
- 411 12. Uchiyama J, Rashed M, Maeda Y, Takemura I, Sugihara S, Akechi K, Muraoka A,  
412 Wakiguchi H, Matsuzaki S. 2008. Isolation and characterization of a novel  
413 *Enterococcus faecalis* bacteriophage phiEF24C as a therapeutic candidate. *FEMS*  
414 *Microbiol Lett* 278:200–206.

- 415 13. Khalifa L, Gelman D, Shlezinger M, Dessal AL, Copenhagen-Glazer S, Beyth N,  
416 Hazan R. 2018. Defeating antibiotic- and phage-resistant *Enterococcus faecalis*  
417 using a phage cocktail *in vitro* and in a clot model. *Front Microbiol* 9:326.
- 418 14. Uchiyama J, Rashed M, Takemura I, Wakiguchi H, Matsuzaki S. 2008. *In silico* and  
419 *in vivo* evaluation of bacteriophage phiEF24C, a candidate for treatment of  
420 *Enterococcus faecalis* infections. *Appl Environ Microbiol* 74:4149–4163.
- 421 15. Uchiyama J, Takemura I, Satoh M, Kato S, Ujihara T, Akechi K, Matsuzaki S,  
422 Daibata M. 2011. Improved adsorption of an *Enterococcus faecalis* bacteriophage  
423 phiEF24C with a spontaneous point mutation. *PLoS One* 6:e26648.
- 424 16. de la Rosa M, Perez M, Carazo C, Pareja L, Peis JI, Hernandez F. 1992. New  
425 Granada Medium for detection and identification of group B streptococci. *J Clin*  
426 *Microbiol* 30:1019–1021.
- 427 17. Heelan JS, Struminsky J, Lauro P, Sung CJ. 2005. Evaluation of a new selective  
428 enrichment broth for detection of group B streptococci in pregnant women. *J Clin*  
429 *Microbiol* 43:896–897.
- 430 18. Nasukawa T, Uchiyama J, Taharaguchi S, Ota S, Ujihara T, Matsuzaki S, Murakami  
431 H, Mizukami K, Sakaguchi M. 2017. Virus purification by CsCl density gradient

- 432 using general centrifugation. Arch Virol 162:3523–3528.
- 433 19. Tanizawa Y, Fujisawa T, Nakamura Y. 2018. DFAST: a flexible prokaryotic genome  
434 annotation pipeline for faster genome publication. Bioinformatics 34:1037–1039.
- 435 20. Tanizawa Y, Fujisawa T, Kaminuma E, Nakamura Y, Arita M. 2016. DFAST and  
436 DAGA: web-based integrated genome annotation tools and resources. Biosci  
437 Microbiota Food Health 35:173–184.
- 438 21. Ruiz-Garbajosa P, Bonten MJ, Robinson DA, Top J, Nallapareddy SR, Torres C,  
439 Coque TM, Cantón R, Baquero F, Murray BE, del Campo R, Willems RJ. 2006.  
440 Multilocus sequence typing scheme for *Enterococcus faecalis* reveals  
441 hospital-adapted genetic complexes in a background of high rates of recombination.  
442 J Clin Microbiol 44:2220–2228.
- 443 22. Jolley KA, Maiden MC. 2010. BIGSdb: scalable analysis of bacterial genome  
444 variation at the population level. BMC Bioinformatics 11:595.
- 445 23. Kumar S, Stecher G, Tamura K. 2016. MEGA7: molecular evolutionary genetics  
446 analysis version 7.0 for bigger datasets. Mol Biol Evol 33:1870–1874.
- 447 24. Vijayakumar PP, Muriana PM. 2015. A microplate growth inhibition assay for  
448 screening bacteriocins against *Listeria monocytogenes* to differentiate their

- 449 mode-of-action. *Biomolecules* 5:1178–1194.
- 450 25. Kanda Y. 2013. Investigation of the freely available easy-to-use software “EZR” for  
451 medical statistics. *Bone Marrow Transplant* 48:452–458.
- 452 26. Lefkowitz EJ, Dempsey DM, Hendrickson RC, Orton RJ, Siddell SG, Smith DB.  
453 2018. Virus taxonomy: the database of the International Committee on Taxonomy of  
454 Viruses (ICTV). *Nucleic Acids Res* 46:D708–D717.
- 455 27. Klumpp J, Lavigne R, Loessner MJ, Ackermann HW. 2010. The SPO1-related  
456 bacteriophages. *Arch Virol* 155:1547–1561.
- 457 28. Nes IF, Diep DB, Holo H. 2007. Bacteriocin diversity in *Streptococcus* and  
458 *Enterococcus*. *J Bacteriol* 189:1189–1198.
- 459 29. Ando H, Lemire S, Pires DP, Lu TK. 2015. Engineering modular viral scaffolds for  
460 targeted bacterial population editing. *Cell Syst* 1:187–196.
- 461 30. Koskella B, Brockhurst MA. 2014. Bacteria-phage coevolution as a driver of  
462 ecological and evolutionary processes in microbial communities. *FEMS Microbiol*  
463 *Rev* 38:916–931.
- 464 31. Ackermann H, Tremblay D, Moineau S. 2004. Long-term bacteriophage  
465 preservation *WFCC Newsl* 38:35–40.

- 466 32. Lobočka MB, Glowacka A, Golec P. 2018. Methods for bacteriophage preservation.  
467 Methods Mol Biol 1693:219–230.
- 468 33. Ulisse S, Peccio A, Orsini G, Di Emidio B. 2006. A study of the shelf-life of critical  
469 culture media. Vet Ital 42:237–247.
- 470 34. Carvalho Mda G, Facklam R, Jackson D, Beall B, McGee L. 2009. Evaluation of  
471 three commercial broth media for pigment detection and identification of a group B  
472 *Streptococcus* (*Streptococcus agalactiae*). J Clin Microbiol 47:4161–4163.
- 473 35. Agboluaje M, Sauvageau D. 2018. Bacteriophage production in bioreactors.  
474 Methods Mol Biol 1693:173–193.
- 475 36. Krysiak-Baltyn K, Martin GJO, Gras SL. 2018. Computational modeling of  
476 bacteriophage production for process optimization. Methods Mol Biol 1693:195–  
477 218.
- 478 37. Krysiak-Baltyn K, Martin GJO, Gras SL. 2018. Computational modelling of large  
479 scale phage production using a two-stage batch process. Pharmaceuticals (Basel)  
480 11:pii:E31.
- 481 38. Forde A, Hill C. 2018. Phages of life - the path to pharma. Br J Pharmacol 175:412–  
482 418.

- 483 39. Los M, Czyz A, Sell E, Wegrzyn A, Neubauer P, Wegrzyn G. 2004. Bacteriophage  
484 contamination: is there a simple method to reduce its deleterious effects in  
485 laboratory cultures and biotechnological factories? J Appl Genet 45:111–120.  
486  
487

488 **Figure legends**

489

490 **FIG 1** *E. faecalis* strains isolated from vaginal swabs and their sensitivity to phages.

491 Phylogenetic tree of *E. faecalis* strains was constructed based on the concatenated MLST

492 alleles. In the phylogenetic tree, *E. faecalis* strain names are followed by STs in brackets.

493 Phage sensitivities to each phage and phage mixture are shown below the phylogenetic tree.

494

495 **FIG 2** Effects of phage mixture treatment on *E. faecalis* growth in GBwSM. (A) Four

496 growth patterns of *E. faecalis* strains treated with phage mixture. *E. faecalis* strains were

497 treated, or not, with the phage mixture, and culture turbidities were evaluated by measuring

498 optical density at 595 nm (OD<sub>595</sub>) over time. Thirty *E. faecalis* strains isolated from

499 vaginal swabs, described in Fig. 1, were individually tested. The growth curves were

500 graphed using means and standard deviations from triplicate experiments. The growth

501 curves of phage-treated *E. faecalis* strains were categorized into four types, patterns A–D,

502 after comparing with the growth curves of untreated *E. faecalis* strains. For the growth

503 patterns A–C, phage treatments with all tested phage dilutions inhibited *E. faecalis* growth

504 compared with the negative control (i.e., no phage treatment). In growth pattern D, phage

505 mixture did not inhibit bacterial growth. The representative growth curves were presented:  
506 pattern A, strain EF08 treated with phage mixture at MOI of each phage to *E. faecalis* at 1;  
507 pattern B, strain EF22 treated with phage mixture at MOI of each phage to *E. faecalis* at  
508  $10^{-2}$ ; pattern C, strain EF05 treated with phage mixture at MOI of each phage to *E. faecalis*  
509 at  $10^{-4}$ ; pattern D, strain EF02 treated with phage mixture at MOI of each phage to *E.*  
510 *faecalis* at 1. (B) Summary of the effect of phage mixture treatments on *E. faecalis* growth  
511 when three different phage mixture dilutions were tested. Phage densities (MOI) for each  
512 phage type were 1,  $10^{-2}$ , or  $10^{-4}$ . *E. faecalis* growth patterns were classified based on the *E.*  
513 *faecalis* growth patterns described in Fig. 2A, and are summarized as cumulative bar  
514 graphs.

515

516 **FIG 3** Growth of *E. faecalis* and *S. agalactiae* co-cultures in the presence or absence of  
517 phage mixtures in GBwSM. No phage treatment (A); or treatment with phages at  $10^{-3}$  at (B)  
518 or  $10^{-1}$  (C) MOI of each phage to *E. faecalis*. The means with standard deviations were  
519 calculated from triplicate experiments, and are plotted as points with error bars. Time points  
520 at which *S. agalactiae* density was significantly higher than that of *E. faecalis* are indicated  
521 by asterisks ( $P < 0.01$ ; Student's *t*-test).



522

523 **FIG 4** Bacterial identification on chromogenic agar after experimental enrichment  
524 co-culture of *S. agalactiae* and *E. faecalis*. Combinations of single strains of *E. faecalis* and  
525 *S. agalactiae* were used to inoculate GBwSM, and were cultured in the presence of the  
526 phage mixture (MOI of each phage to *E. faecalis*:  $10^{-1}$ ) or THB. After enrichment culture,  
527 aliquots were spread on the chromogenic agar, and the resultant bacterial colonies were  
528 evaluated. Colonies of *S. agalactiae* and *E. faecalis* are red and blue, respectively. Left and  
529 right panels, photographs of chromogenic agar plates inoculated with enriched cultures  
530 treated with THB or phage mixtures, respectively. Representative data for three out of five  
531 *S. agalactiae*–*E. faecalis* sets are shown, namely, KUGBS2–KUEF08 (A), KUGBS1–  
532 KUEF24 (B), and KUGBS6–KUEF26 (C).

533

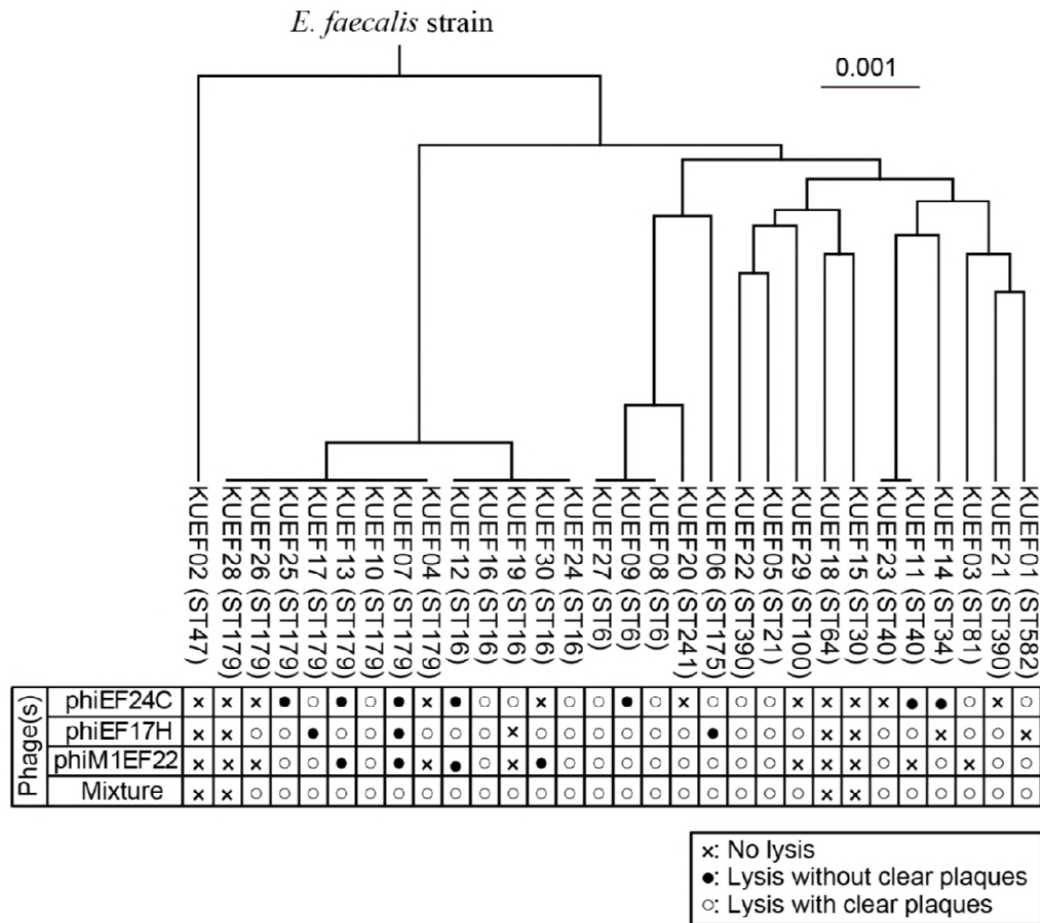

**FIG 1** *E. faecalis* strains isolated from vaginal swabs and their sensitivity to phages. Phylogenetic tree of *E. faecalis* strains was constructed based on the concatenated MLST alleles. In the phylogenetic tree, *E. faecalis* strain names are followed by STs in brackets. Phage sensitivities to each phage and phage mixture are shown below the phylogenetic tree.

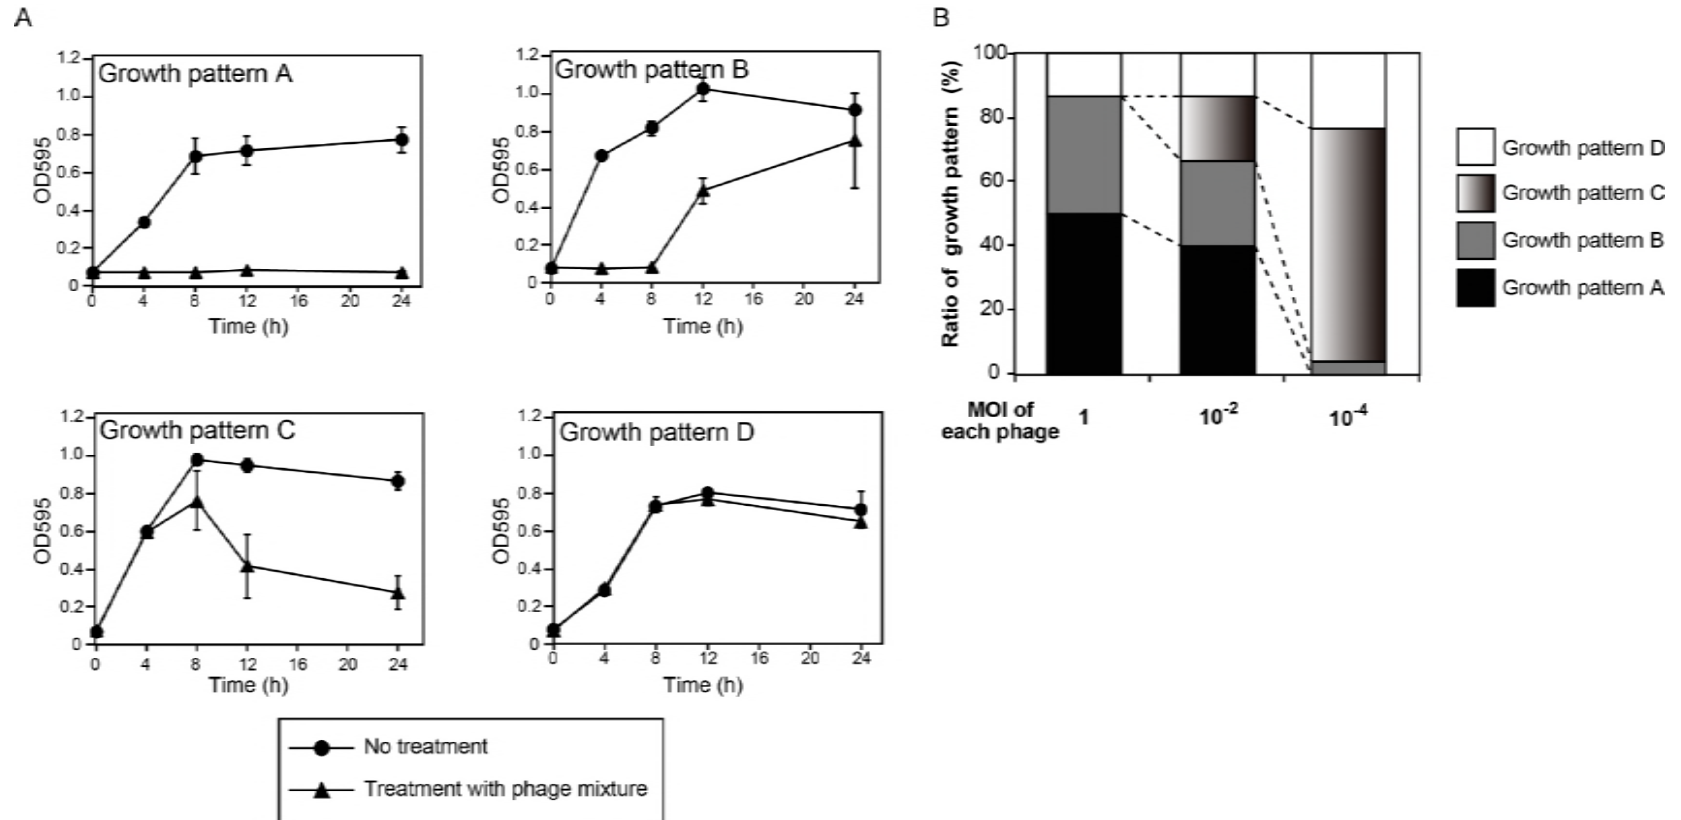

**FIG 2** Effects of phage mixture treatment on *E. faecalis* growth in GBwSM. (A) Four growth patterns of *E. faecalis* strains treated with phage mixture. *E. faecalis* strains were treated, or not, with the phage mixture, and culture turbidities were evaluated by measuring optical

density at 595 nm (OD<sub>595</sub>) over time. Thirty *E. faecalis* strains isolated from vaginal swabs, described in Fig. 1, were individually tested. The growth curves were graphed using means and standard deviations from triplicate experiments. The growth curves of phage-treated *E. faecalis* strains were categorized into four types, patterns A–D, after comparing with the growth curves of untreated *E. faecalis* strains. For the growth patterns A–C, phage treatments with all tested phage dilutions inhibited *E. faecalis* growth compared with the negative control (i.e., no phage treatment). In growth pattern D, phage mixture did not inhibit bacterial growth. The representative growth curves were presented: pattern A, strain EF08 treated with phage mixture at MOI of each phage to *E. faecalis* at 1; pattern B, strain EF22 treated with phage mixture at MOI of each phage to *E. faecalis* at 10<sup>-2</sup>; pattern C, strain EF05 treated with phage mixture at MOI of each phage to *E. faecalis* at 10<sup>-4</sup>; pattern D, strain EF02 treated with phage mixture at MOI of each phage to *E. faecalis* at 1. (B) Summary of the effect of phage mixture treatments on *E. faecalis* growth when three different phage mixture dilutions were tested. Phage densities (MOI) for each phage type were 1, 10<sup>-2</sup>, or 10<sup>-4</sup>. *E. faecalis* growth patterns were classified based on the *E. faecalis* growth patterns described in Fig. 2A, and are summarized as cumulative bar graphs.

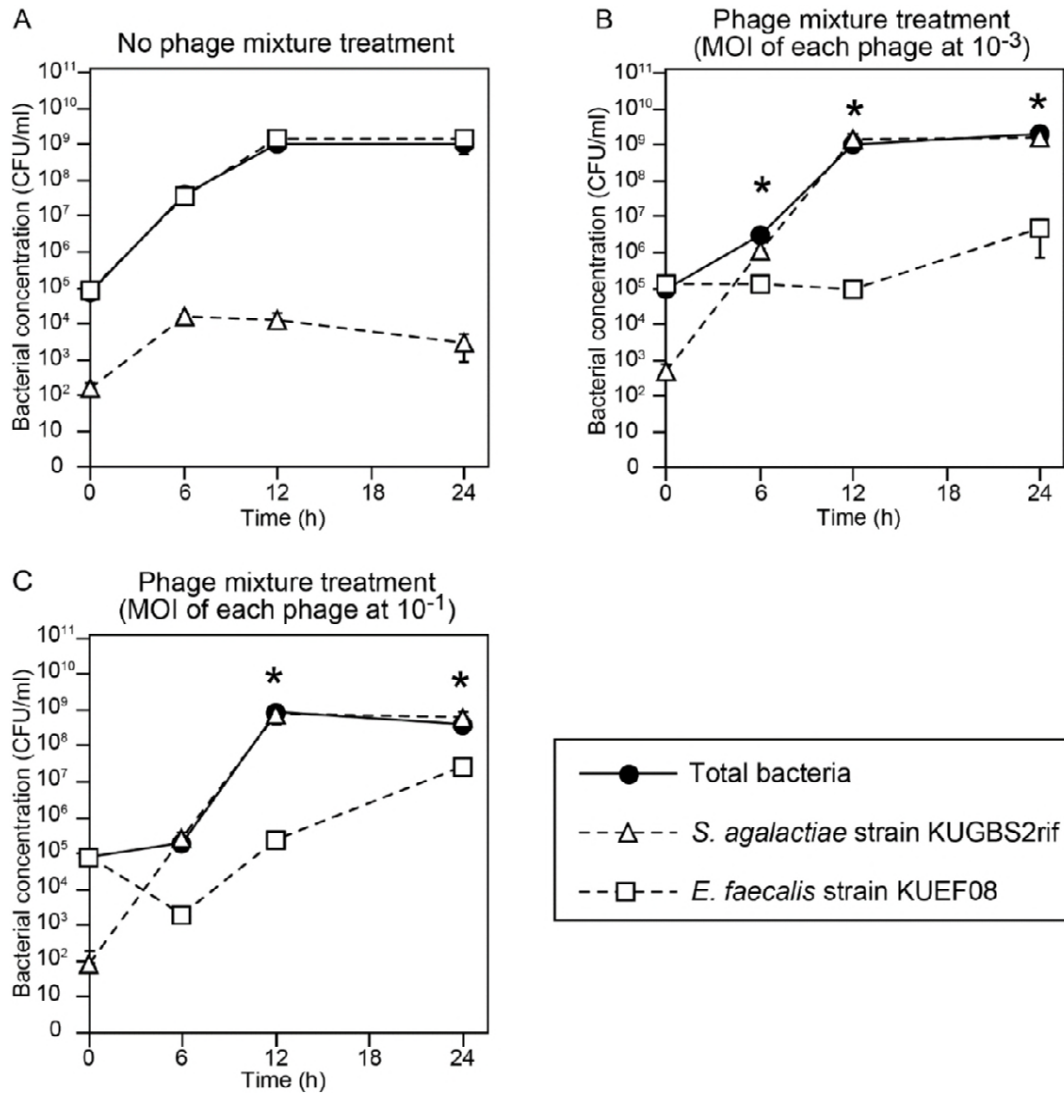

**FIG 3** Growth of *E. faecalis* and *S. agalactiae* co-cultures in the presence or absence of phage mixtures in GBwSM. No phage treatment (A); or treatment with phages at 10<sup>-3</sup> (B) or 10<sup>-1</sup> (C) MOI of each phage to *E. faecalis*. The means with standard deviations were calculated from triplicate experiments, and are plotted as points with error bars. Time points at which *S. agalactiae* density was significantly higher than that of *E. faecalis* are indicated by asterisks ( $P < 0.01$ ; Student's *t*-test).

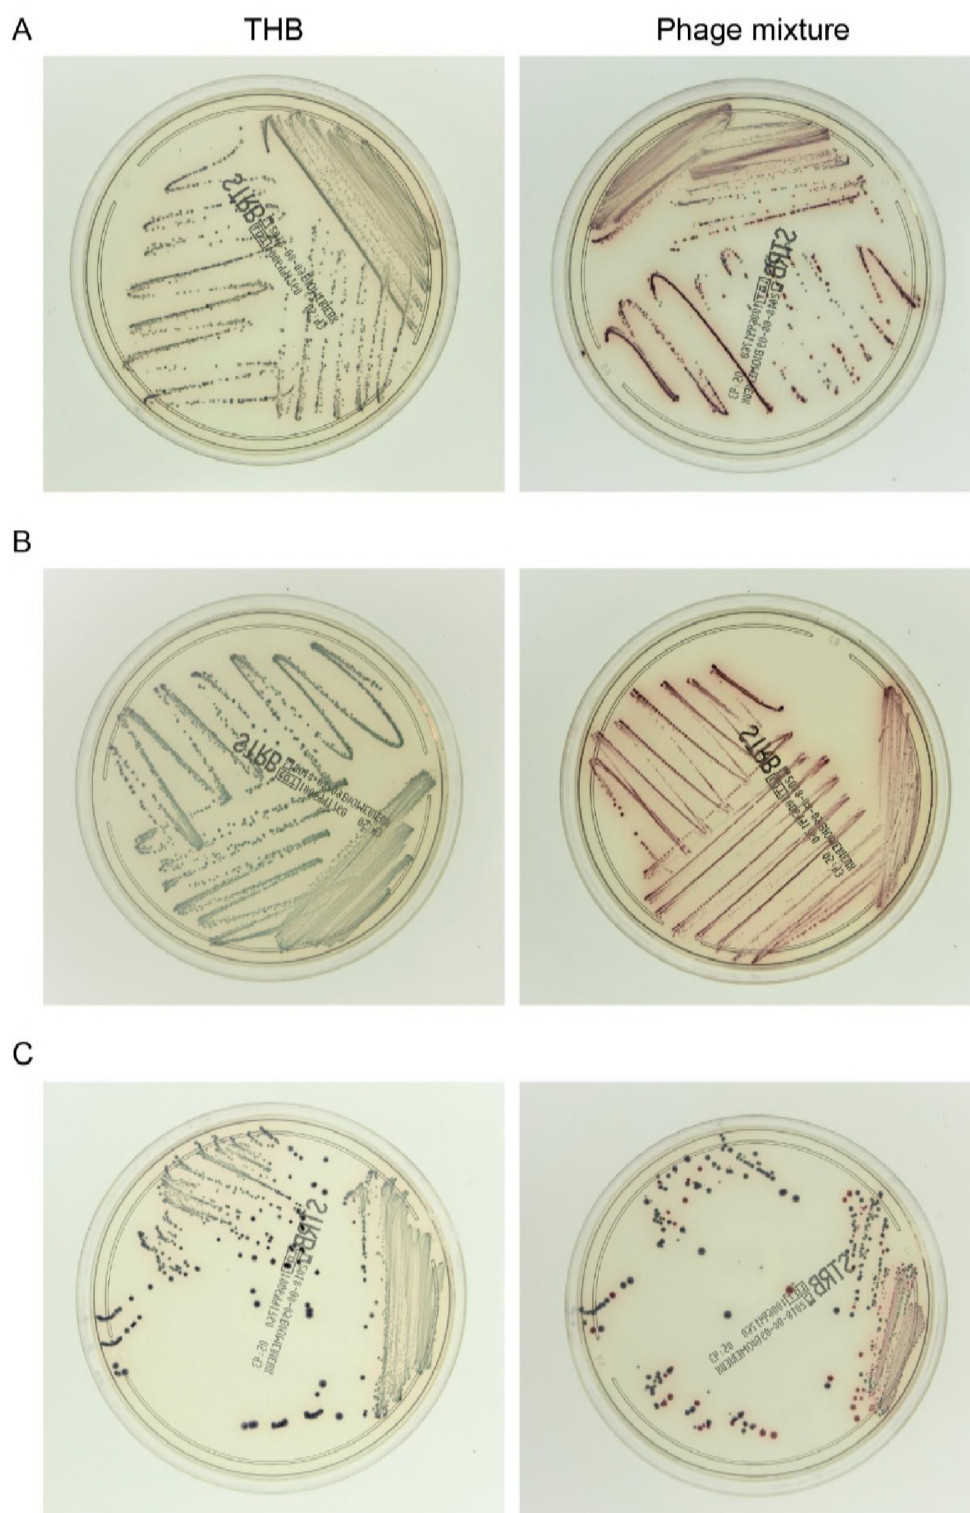

**FIG 4** Bacterial identification on chromogenic agar after experimental enrichment co-culture of *S. agalactiae* and *E. faecalis*. Combinations of single strains of *E. faecalis* and *S. agalactiae* were used to inoculate GBwSM, and were cultured in the presence of the phage mixture (MOI of each phage to *E. faecalis*:  $10^{-1}$ ) or THB. After enrichment culture, aliquots were spread on the chromogenic agar, and the resultant bacterial colonies were evaluated. Colonies of *S. agalactiae* and *E. faecalis* are red and blue, respectively. Left and right panels, photographs of chromogenic agar plates inoculated with enriched cultures treated with THB or phage mixtures, respectively. Representative data for three out of five *S. agalactiae*–*E. faecalis* sets are shown, namely, KUGBS2–KUEF08 (A), KUGBS1–KUEF24 (B), and KUGBS6–KUEF26 (C).
